# Supplementary material for: Mobile Apps to Improve Medication Adherence in Cardiovascular Disease: Systematic Review and Meta-analysis
Source: PubMed Central journal article supplement (PMC8188316; doi:10.2196/24190), 2021-05-25
Supplement: jmir_v23i5e24190_app1.pdf [file jmir_v23i5e24190_app1.pdf]

## Multimedia Appendix 1. Search strategy: Ovid MEDLINE (1946 to January 2020).

1. exp Cardiovascular diseases/
2. Cardiovascular disease\*.mp.
3. Cardiovascular disease\$.tw.
4. 1 or 2 or 3
5. ((cell\$ or mobile\$) adj3 phone\$).tw.
6. (handheld\$ or hand-held\$).tw.
7. PDA.tw.
8. (personal\$ adj3 digital\$).tw.
9. ("Palm OS" or "Palm Pre classic").tw.
10. (smartphone\$ or smart-phone\$).tw.
11. Blackberry.tw.
12. Nokia.tw.
13. (windows adj3 (mobile\$ or phone\$)).tw.
14. INQ.tw.
15. HTC.tw.
16. Sidekick.tw.
17. Android.tw.
18. iPhone\$.tw.
19. iPad.tw.
20. iPod.tw.
21. (tablet adj3 (device\$ or comput\$)).tw.
22. (mhealth or m-health or "m health").tw.
23. "mobile health".tw.
24. exp Telemedicine/
25. (telehealth\$ or tele-health\$).tw.
26. telecare\$ or tele-care\$).tw.
27. (e-health or ehealth or "e health").tw.
28. (app\$ adj3 (smartphone\$ or smart-phone or mobile\$ or phone\$)).tw.
29. (palm\$ adj3 computer\$).tw.
30. 5 or 6 or 7 or 8 or 9 or 10 or 11 or 12 or 13 or 14 or 15 or 16 or 17 or 18 or 19 or 20 or 21 or 22 or 23  
or 24 or 25 or 26 or 27 or 28 or 29
31. exp Medication Adherence/
32. exp Patient Compliance/
33. "Treatment Adherence and Compliance".tw.
34. (Treatment Adherence and Compliance).tw.
35. 31 or 32 or 33 or 34
36. 4 and 30 and 35
