# Supplementary material for: Mobile Apps to Improve Medication Adherence in Cardiovascular Disease: Systematic Review and Meta-analysis
Source: PubMed Central journal article supplement (PMC8188316; doi:10.2196/24190), 2021-05-25
Supplement: jmir_v23i5e24190_app2.pdf [file jmir_v23i5e24190_app2.pdf]

**Multimedia Appendix 2. Medication adherence of the included randomized controlled trials.**

| Source              | Total length of intervention | Medications monitoring                                                                                                                      | Medication adherence measurement                                                              | Medication adherence results                                                                                                                                                                                                                                                                             |
|---------------------|------------------------------|---------------------------------------------------------------------------------------------------------------------------------------------|-----------------------------------------------------------------------------------------------|----------------------------------------------------------------------------------------------------------------------------------------------------------------------------------------------------------------------------------------------------------------------------------------------------------|
| Brath et al [19]    | 20 weeks (5 months)          | Antihypertensive medication (ramipril)<br>Antihyperglycemic medication (metformin)<br>Lipid-lowering medication (simvastatin, rosuvastatin) | Intervention: remote mAMS <sup>a</sup><br>Control: pill count of standard medication blisters | Intervention: median (IQR) <sup>b</sup> , min, max:<br>Metformin 1(1–1),0.93,1<br>Simvastatin 1(1–1),0.93,1<br>Rosuvastatin 1(1–1), 0.97,1<br>Ramipril 1(1–1),0.96,1<br>Control:<br>Metformin 1(1–1),0.89,1<br>Simvastatin 1(1–1),1,1<br>Rosuvastatin 1(1–1),0.91,1<br>Ramipril 1(1–1),0.93,1            |
| Chandler et al [20] | 9 months                     | Antihypertensive medications                                                                                                                | Intervention and control: 8-MMAS <sup>c</sup>                                                 | Intervention: mean (SD) <sup>d</sup><br>Baseline: 6.83 (1.99)<br>1 month: 9.42 (0.95)<br>3 months: 9.13 (1.50)<br>6 months: 10.22 (0.43)<br>9 months: 9.81 (1.31)<br>Control:<br>Baseline: 6.99 (2.39)<br>1 month: 7.85 (1.66)<br>3 months: 7.98 (1.95)<br>6 months: 7.48 (1.7)<br>9 months: 6.84 (1.52) |
| Fang and Li [21]    | 6 months                     | Lipid-lowering medications (statin)                                                                                                         | Intervention and control: 4-MMAS <sup>e</sup>                                                 | Intervention: mean (SD)<br>Baseline:<br>2.88 (0.71)<br>2.86 (0.71)<br>Control:<br>Baseline: 2.86 (0.87)<br>6 months: logistic regression analysis results                                                                                                                                                |

| Source               | Total length of intervention | Medications monitoring                                                                                                                                               | Medication adherence measurement                                                                                                        | Medication adherence results                                                                                                                                                                                           |
|----------------------|------------------------------|----------------------------------------------------------------------------------------------------------------------------------------------------------------------|-----------------------------------------------------------------------------------------------------------------------------------------|------------------------------------------------------------------------------------------------------------------------------------------------------------------------------------------------------------------------|
| Frias et al [22]     | 12 weeks (3 months)          | Antihypertensive medications (lisinopril, losartan, amlodipine)<br>Antihyperglycemic medications (metformin, glipizide)<br>Lipid-lowering medications (atorvastatin) | Intervention: DMO <sup>f</sup> ; mean ingestion adherence                                                                               | Intervention: % of the ingestion adherent<br>Baseline: 86%<br>3 months: 84%<br>Control: not assessed                                                                                                                   |
| Goldstein et al [23] | 28 days (1 month)            | Not specified                                                                                                                                                        | Intervention: electronic self-report<br>Control: pillbox bin openings                                                                   | Intervention: % (SD) adherent patients<br>1 month:<br>Overall: 76% (36)<br>Active arm: 73% (39)<br>Passive arm: 79% (33)<br>Control:<br>1 month:<br>Overall: 80% (33)<br>Active arm: 84% (32)<br>Passive arm: 76% (33) |
| Guo et al [24]       | 3 months                     | Oral anticoagulants                                                                                                                                                  | Intervention and control: 3-item Adherence Estimator:<br>Low risk= score of 0, moderate risk= score of 2-7, and high risk=score of 8-36 | Intervention:<br>Baseline: 4 (4-11)<br>1 month: 0 (0-4)<br>3 months: 2 (0-4)<br>Control:<br>Baseline: 4 (4-11)<br>1 month: 4 (0-11)<br>3 months: 4 (0-11)                                                              |
| Johnston et al [25]  | 6 months                     | Oral anticoagulants (ticagrelor)                                                                                                                                     | Intervention and control: patient self-reported questionnaire (for non-adherence measure)                                               | Intervention: mean (SD)<br>6 months: 16.6 (42.9)<br>Control:<br>6 months: 22.8 (41.3)                                                                                                                                  |

| Source              | Total length of intervention | Medications monitoring                                               | Medication adherence measurement                                                                                                                                                                     | Medication adherence results                                                                                                                                                                                                                                                                                                                                                           |
|---------------------|------------------------------|----------------------------------------------------------------------|------------------------------------------------------------------------------------------------------------------------------------------------------------------------------------------------------|----------------------------------------------------------------------------------------------------------------------------------------------------------------------------------------------------------------------------------------------------------------------------------------------------------------------------------------------------------------------------------------|
| Kim et al [26]      | 6 months                     | Antihypertensive medications                                         | Intervention and control: 4-MMAS                                                                                                                                                                     | Intervention: mean (SD)<br>Baseline: 6.6 (1.4)<br>6 months: 6.7 (1.4)<br>Control:<br>Baseline: 6.3 (1.4)<br>6 months: 6.5 (1.5)                                                                                                                                                                                                                                                        |
| Labovitz et al [27] | 12 weeks (3 months)          | Oral anticoagulants (warfarin, dabigatran, rivaroxaban, or apixaban) | Intervention and control: pill counts and plasma samples (plasma samples were marked as adherent if drug concentration levels were above the minimum required therapeutic range (C <sub>min</sub> )) | For all OACs <sup>g</sup> , 3 months: based on pill count, mean% (SD)<br>Intervention: 97.2% (4.4)<br>Control: 90.6% (5.8)<br>Based on plasma samples:<br>Intervention: 100%<br>Control: 50%<br>For DOACs <sup>h</sup> , 3 months: based on pill count, mean (SD)<br>Intervention: 96.4 (5.1)<br>Control: 90.9 (6.0)<br>Based on plasma samples:<br>Intervention: 100%<br>Control: 33% |
| Liu et al [28]      | 12 weeks (3 months)          | Lipid-lowering medications                                           | Intervention and control: 4-MMAS                                                                                                                                                                     | Intervention: % adherent patients<br>Baseline: 43.33%<br>3 months: 82.14%<br>Control:<br>Baseline: 30.00%<br>3 months: 37.93%                                                                                                                                                                                                                                                          |

| Source                       | Total length of intervention | Medications monitoring                                                                                                                                | Medication adherence measurement                                                                                                                                                                       | Medication adherence results                                                                                                                                                                                           |
|------------------------------|------------------------------|-------------------------------------------------------------------------------------------------------------------------------------------------------|--------------------------------------------------------------------------------------------------------------------------------------------------------------------------------------------------------|------------------------------------------------------------------------------------------------------------------------------------------------------------------------------------------------------------------------|
| Márquez Cantreras et al [29] | 12 months                    | Antihypertensive medications                                                                                                                          | Intervention and control: MEMS <sup>i</sup>                                                                                                                                                            | Intervention: % global adherence (95% CI) <sup>j</sup><br>6 months: 93.15% (87.36 to 98.94)<br>12 months: 91.78% (85.48 to 98.08)<br>Control:<br>6 months: 74.66% (64.7 to 84.6)<br>12 months: 62.66% (51.26 to 73.14) |
| Mertens et al [30]           | 28 days (1 month)            | Not specified                                                                                                                                         | Intervention and control: A14-scale questionnaire: 5-point Likert scale, ranging from “never” (0) to “very often” (4), based on the A14 scale, values <50 as nonadherent, and values 50-56 as adherent | Intervention: mean (SD)<br>Baseline: 50.02 (3.44)<br>1 month: 53.96 (2.01)<br>Control:<br>Baseline: 50.02 (3.44)<br>1 month: 52.60 (2.49)                                                                              |
| Morawski et al [31]          | 12 weeks (3 months)          | Antihypertensive medications (thiazide, calcium channel blocker, b-blocker, angiotensin converting enzyme inhibitor, or angiotensin receptor blocker) | Intervention and control: 8-MMAS                                                                                                                                                                       | Intervention: mean (SD)<br>Baseline: 6.0 (1.8)<br>3 months: 6.3 (1.6)<br>Control:<br>Baseline: 5.7 (1.8)<br>3 months: 5.7 (1.8)                                                                                        |

| Source           | Total length of intervention | Medications monitoring       | Medication adherence measurement                                                 | Medication adherence results                                                                                                                                                                                                                            |
|------------------|------------------------------|------------------------------|----------------------------------------------------------------------------------|---------------------------------------------------------------------------------------------------------------------------------------------------------------------------------------------------------------------------------------------------------|
| Ni et al [32]    | 30 days (1 month)            | Cardiovascular medications   | Intervention and control: 3-question Voils Medication Non-adherence Extent Scale | Intervention: mean (SD)<br>Baseline: 6.28 (2.14)<br>1 month: -1.35 (2.18)<br>Control:<br>Baseline: 6.28 (1.99)<br>1 month: -0.69 (1.58)                                                                                                                 |
| Santo et al [33] | 3 months                     | Cardiovascular medications   | Intervention and control: 8-MMAS                                                 | Intervention: mean (SD)<br>Baseline: 6.8 (1.40)<br>3 months: 7.11 (1.05)<br>Control:<br>Baseline: 7.0 (1.29)<br>3 months: 6.63 (1.04)                                                                                                                   |
| Sarfo et al [34] | 3 months                     | Antihypertensive medications | Intervention and control: mean MPR <sup>k</sup> and 8-MMAS                       | Intervention: mean (SD)<br>Baseline: 10.3 (3.1)<br>9 months: 13.0 (1.5)<br>MPR:<br>3 months: 0.88 (0.40)<br>9 months: 0.95 (0.16)<br>Control:<br>Baseline: 11.5 (2.8)<br>9 months: 13.0 (1.7)<br>MPR:<br>3 months: 0.64 (0.45)<br>9 months: 0.98 (0.24) |

<sup>a</sup>mAMS: medication adherence measurement system.

<sup>b</sup>IQR: interquartile range.

<sup>c</sup>8-MMAS: 8-item Morisky Medication Adherence Scale.

<sup>d</sup>SD: standard deviation.

<sup>e</sup>4-MMAS: 4-item Morisky Medication Adherence Scale.

<sup>f</sup>DMO: digital medicine offering system.

<sup>g</sup>OACs: oral anticoagulants.

<sup>h</sup>DOACs: direct oral anticoagulants.

<sup>i</sup>MEMSs: Medication Event Monitoring Systems.

<sup>j</sup>95% CI: 95% confidence interval.

<sup>k</sup>MPR: medication possession ratio.
