# Supplementary material for: Mobile Apps to Improve Medication Adherence in Cardiovascular Disease: Systematic Review and Meta-analysis
Source: PubMed Central journal article supplement (PMC8188316; doi:10.2196/24190), 2021-05-25
Supplement: jmir_v23i5e24190_app3.pdf [file jmir_v23i5e24190_app3.pdf]

**Multimedia Appendix 3. Clinical outcomes of the included randomized controlled trials.**

| Source              | Total length of intervention | Blood pressure                                                                                                                                                                                                                                                                                                                                                                                        | Cholesterol level                                                                                                                                                                                                                                                                                                            | Blood glucose level                                                                                                                                  |
|---------------------|------------------------------|-------------------------------------------------------------------------------------------------------------------------------------------------------------------------------------------------------------------------------------------------------------------------------------------------------------------------------------------------------------------------------------------------------|------------------------------------------------------------------------------------------------------------------------------------------------------------------------------------------------------------------------------------------------------------------------------------------------------------------------------|------------------------------------------------------------------------------------------------------------------------------------------------------|
| Brath et al [19]    | 20 weeks (5 months)          | Intervention and control (crossover design): mean<br>Baseline:<br>SBP <sup>a</sup> 133<br>DBP <sup>b</sup> 75<br>5 months:<br>SBP 128<br>DBP 70                                                                                                                                                                                                                                                       | Intervention and control (crossover design): median (lower-upper quartile)<br>Baseline:<br>TC <sup>c</sup> 166 (147-183) mg/dL<br>LDL-C <sup>d</sup> 87 (68-102) mg/dL<br>HDL-C <sup>e</sup> mean (SD) <sup>f</sup><br>48 (12) mg/dL<br>5 months:<br>TC 155 (141-167) mg/dL<br>LDL-C 80 (67-92) mg/dL<br>HDL-C 47 (13) mg/dL | Intervention and control (crossover design):<br>HbA <sub>1c</sub> <sup>g</sup> , %:<br>mean (SD)<br>Baseline:<br>7.2 (0.8)<br>5 months:<br>7.1 (0.9) |
| Chandler et al [20] | 9 months                     | Intervention: mean<br>Baseline:<br>SBP 150.7, DBP 86.8<br>1 month:<br>SBP 125.3, DBP 82.1<br>3 months:<br>SBP 120.4, DBP 71.3<br>6 months:<br>SBP 121.2, DBP 74.7<br>9 months:<br>SBP 121.8, DBP 74.2<br>Control:<br>Baseline:<br>SBP 152.3, DBP 84.6<br>1 months:<br>SBP 140.6, DBP 78.3<br>3 months:<br>SBP 137.5, DBP 75.4<br>6 months:<br>SBP 138.9, DBP 77.5<br>9 months:<br>SBP 145.7, DBP 79.4 | Not assessed                                                                                                                                                                                                                                                                                                                 | Not assessed                                                                                                                                         |

| Source                           | Total length of intervention | Blood pressure                                                                                                                                                                                                                                                                                                                                                                                                                                                                                                                                                            | Cholesterol level                                                                                                                                                                                                                                                                                                                                                                                                                                                                                                                                                                                                    | Blood glucose level                                                                                                                                                                                                                                                                                              |
|----------------------------------|------------------------------|---------------------------------------------------------------------------------------------------------------------------------------------------------------------------------------------------------------------------------------------------------------------------------------------------------------------------------------------------------------------------------------------------------------------------------------------------------------------------------------------------------------------------------------------------------------------------|----------------------------------------------------------------------------------------------------------------------------------------------------------------------------------------------------------------------------------------------------------------------------------------------------------------------------------------------------------------------------------------------------------------------------------------------------------------------------------------------------------------------------------------------------------------------------------------------------------------------|------------------------------------------------------------------------------------------------------------------------------------------------------------------------------------------------------------------------------------------------------------------------------------------------------------------|
| Frias et al <sup>h</sup><br>[22] | 12 weeks<br>(3 months)       | <p>Intervention: mean (SD)</p> <p>Mean (SE)<sup>i</sup></p> <p>Baseline:</p> <p>SBP 149.3 (SE 1.5)<br/>=149.3 (SD 13.42)</p> <p>DBP 86.2 (SE 3.2)<br/>=86.2 (SD 28.62)</p> <p>3 months: mean change (SD)</p> <p>SBP -20.9 (SE 3.4)<br/>=-20.9 (SD 30.41)</p> <p>DBP -8.6 (SE 2.2)<br/>=-8.6 (SD 19.68)</p> <p>Control:</p> <p>Baseline:</p> <p>SBP 155.4 (SE 3.0)<br/>=155.4 (SD 16.16)</p> <p>DBP 83.9 (SE 2.9)<br/>=83.9 (SD 15.62)</p> <p>3 months: mean change (SD)</p> <p>SBP -15.2 (SE 2.0)<br/>=-15.2 (SD 10.77)</p> <p>DBP -5.8 (SE 2.2)<br/>=-5.8 (SD 11.85)</p> | <p>Intervention: mean (SD)</p> <p>Baseline:</p> <p>TC 177.4 (SE 9.5) mg/dL<br/>=4.59 (SD 1.57) mmol/L</p> <p>LDL-C 103.9 (10.1 SE) mg/dL<br/>=2.69 (SD 1.67) mmol/L</p> <p>3 months:</p> <p>TC -29.5 (SE 7.4) mg/dL<br/>=-0.76 (SD 1.23) mmol/L</p> <p>LDL-C -21.3 (SE 10.0) mg/dL<br/>=-0.55 (SD 1.66) mmol/L</p> <p>Control:</p> <p>Baseline:</p> <p>TC 174.4 (SE 13.1) mg/dL<br/>=4.51 (SD 1.62) mmol/L</p> <p>LDL-C 99.3 (SE 6.7) mg/dL<br/>=2.57 (SD 0.83) mmol/L</p> <p>3 months:</p> <p>TC -21.9 (SE 10.2) mg/dL<br/>=-0.57 (SD 1.27) mmol/L</p> <p>LDL-C -9.5 (SE 5.6) mg/dL<br/>=-0.25 (SD 0.69) mmol/L</p> | <p>Intervention:</p> <p>HbA<sub>1c</sub>, %:<br/>mean (SD)</p> <p>Baseline:<br/>8.66 (SE 0.18)<br/>=8.66 (SD 1.61)</p> <p>3 months:<br/>-0.19 (SE 0.14)<br/>=-0.19 (SD 1.25)</p> <p>Control:</p> <p>Baseline:<br/>8.28 (SE 0.38)<br/>=8.28 (SD 2.05)</p> <p>3 months:<br/>0.26 (SE 0.35)<br/>=0.26 (SD 1.88)</p> |

| Source              | Total length of intervention | Blood pressure                                                                                                                                                                                                                                                                                                                                                                                                                                         | Cholesterol level                                                                                                                                                                                                                                                                                                                            | Blood glucose level |
|---------------------|------------------------------|--------------------------------------------------------------------------------------------------------------------------------------------------------------------------------------------------------------------------------------------------------------------------------------------------------------------------------------------------------------------------------------------------------------------------------------------------------|----------------------------------------------------------------------------------------------------------------------------------------------------------------------------------------------------------------------------------------------------------------------------------------------------------------------------------------------|---------------------|
| Johnston et al [25] | 6 months                     | <p>Intervention: mean (SD)</p> <p>Baseline:</p> <p>SBP 131.1 (14.6)</p> <p>DBP 78.8 (11.0)</p> <p>3 months: mean change (SD)</p> <p>SBP -3.1 (18.7)</p> <p>DBP -1.2 (13.1)</p> <p>6 months:</p> <p>SBP -0.6 (16.3)</p> <p>DBP 1.9 (13.0)</p> <p>Control:</p> <p>Baseline</p> <p>SBP 125.2 (17.9)</p> <p>DBP 75.5 (11.0)</p> <p>3 months:</p> <p>SBP 3.0 (16.2)</p> <p>DBP 2.0 (10.5)</p> <p>6 months:</p> <p>SBP -1.1 (19.6)</p> <p>DBP 1.5 (11.8)</p> | <p>Intervention: mean (SD)</p> <p>Baseline:</p> <p>LDL-C 3.9 (1.2) mmol/L</p> <p>3 months:</p> <p>LDL-C -1.9 (1.1) mmol/L</p> <p>6 months:</p> <p>LDL-C -1.8 (1.0) mmol/L</p> <p>Control:</p> <p>Baseline:</p> <p>LDL-C 3.3 (0.9) mmol/L</p> <p>3 months:</p> <p>LDL-C -1.4 (1.1) mmol/L</p> <p>6 months:</p> <p>LDL-C -1.0 (1.5) mmol/L</p> | Not assessed        |
| Kim et al [26]      | 6 months                     | <p>Intervention: mean (SD)</p> <p>Baseline:</p> <p>SBP 136.1 (15.2)</p> <p>DBP 86.3 (12.8)</p> <p>6 months:</p> <p>SBP 133.4 (12.9)</p> <p>DBP 82.8 (11.2)</p> <p>Control:</p> <p>Baseline:</p> <p>SBP 145.9 (19.5)</p> <p>DBP 93.1 (14.1)</p> <p>6 months:</p> <p>SBP 140.2 (18.4)</p> <p>DBP 85.3 (12.1)</p>                                                                                                                                         | Not assessed                                                                                                                                                                                                                                                                                                                                 | Not assessed        |

| Source                       | Total length of intervention | Blood pressure                                                                                                                                                                                                                                                                                                                                                                                                        | Cholesterol level                                                                                                                                                                                                                                                                                                                                                                                                                                                                                      | Blood glucose level |
|------------------------------|------------------------------|-----------------------------------------------------------------------------------------------------------------------------------------------------------------------------------------------------------------------------------------------------------------------------------------------------------------------------------------------------------------------------------------------------------------------|--------------------------------------------------------------------------------------------------------------------------------------------------------------------------------------------------------------------------------------------------------------------------------------------------------------------------------------------------------------------------------------------------------------------------------------------------------------------------------------------------------|---------------------|
| Liu et al [28]               | 12 weeks (3 months)          | Not assessed                                                                                                                                                                                                                                                                                                                                                                                                          | <p>Intervention: mean (SD)</p> <p>Baseline:</p> <p>TC 3.91 (0.80) mmol/L</p> <p>TG<sup>i</sup> 1.63 (0.78) mmol/L</p> <p>LDL-C 2.29 (0.69) mmol/L</p> <p>3 months:</p> <p>TC 3.61 (0.82) mmol/L</p> <p>TG 1.36 (0.59) mmol/L</p> <p>LDL-C 2.18 (0.73) mmol/L</p> <p>Control:</p> <p>Baseline:</p> <p>TC 4.44 (1.13) mmol/L</p> <p>TG 1.74 (0.84) mmol/L</p> <p>LDL-C 2.68 (1.16) mmol/L</p> <p>3 months:</p> <p>TC 4.39 (0.65) mmol/L</p> <p>TG 2.11 (1.05) mmol/L</p> <p>LDL-C 2.56 (0.74) mmol/L</p> | Not assessed        |
| Márquez Cantreras et al [29] | 12 months                    | <p>Intervention: mean (SD)</p> <p>Baseline:</p> <p>SBP 134.7 (14)</p> <p>DBP 81.64 (8)</p> <p>6 months:</p> <p>SBP 130.6 (12)</p> <p>DBP 78.76 (8)</p> <p>12 months:</p> <p>SBP 132.2 (12)</p> <p>DBP 78.5 (7)</p> <p>Control:</p> <p>Baseline:</p> <p>SBP 134.47 (8)</p> <p>DBP 81.9 (6.8)</p> <p>6 months:</p> <p>SBP 135.2 (8)</p> <p>DBP 82.2 (8)</p> <p>12 months:</p> <p>SBP 134.4 (11)</p> <p>DBP 81.4 (9)</p> | Not assessed                                                                                                                                                                                                                                                                                                                                                                                                                                                                                           | Not assessed        |

| Source              | Total length of intervention | Blood pressure                                                                                                                                                                                                                                                                               | Cholesterol level | Blood glucose level |
|---------------------|------------------------------|----------------------------------------------------------------------------------------------------------------------------------------------------------------------------------------------------------------------------------------------------------------------------------------------|-------------------|---------------------|
| Morawski et al [31] | 12 weeks (3 months)          | Intervention: mean (SD)<br>Baseline:<br>SBP 151.4 (9.0)<br>3 months:<br>SBP 140.8 (15.7)<br>Control:<br>Baseline:<br>SBP 151.3 (9.4)<br>3 months:<br>SBP 141.2 (17.3)<br>DBP not assessed                                                                                                    | Not assessed      | Not assessed        |
| Ni et al [32]       | 30 days (1 month)            | Intervention: mean (SD)<br>Baseline:<br>SBP 125.7 (11.80)<br>DBP 74.24 (10.07)<br>1 month: mean change (SD)<br>SBP 0.93 (10.40)<br>DBP 0.81 (10.38)<br>Control:<br>Baseline:<br>SBP 123.60 (14.27)<br>DBP 73.78 (8.45)<br>1 month: mean change (SD)<br>SBP -3.76 (25.72)<br>DBP 8.71 (21.43) | Not assessed      | Not assessed        |

| Source           | Total length of intervention | Blood pressure                                                                                                                                                                                                                                             | Cholesterol level                                                                                                                                                                                                                                                                                       | Blood glucose level |
|------------------|------------------------------|------------------------------------------------------------------------------------------------------------------------------------------------------------------------------------------------------------------------------------------------------------|---------------------------------------------------------------------------------------------------------------------------------------------------------------------------------------------------------------------------------------------------------------------------------------------------------|---------------------|
| Santo et al [33] | 3 months                     | Intervention: mean (SD)<br>Baseline:<br>SBP 125.9 (17.32)<br>DBP 80.3 (10.51)<br>3 months:<br>SBP 125.0 (17.05)<br>DBP 80.2 (8.76)<br>Control:<br>Baseline:<br>SBP 124.4 (20.17)<br>DBP 78.9 (11.42)<br>3 months:<br>SBP 126.0 (19.12)<br>DBP 81.1 (10.47) | Intervention: mean (SD)<br>Baseline:<br>TC 4.1 (1.12) mmol/L<br>LDL-C 2.2 (0.99) mmol/L<br>3 months:<br>TC 3.60 (0.90) mmol/L<br>LDL-C 1.62 (0.75) mmol/L<br>Control:<br>Baseline:<br>TC 4.1 (1.17) mmol/L<br>LDL-C 2.2 (0.94) mmol/L<br>3 months:<br>TC 3.60 (0.84) mmol/L<br>LDL-C 1.68 (0.70) mmol/L | Not assessed        |
| Sarfo et al [34] | 3 months                     | Intervention: mean (SD)<br>Baseline:<br>SBP 141.3 (30.3)<br>DBP 91.4 (18.0)<br>3 months:<br>SBP 137.3 (21.4)<br>DBP 89.1 (15.0)<br>Control:<br>Baseline:<br>SBP 146.3 (22.5)<br>DBP 89.6 (12.9)<br>3 months:<br>SBP 142.0 (26.5)<br>DBP 85.0 (14.0)        | Not assessed                                                                                                                                                                                                                                                                                            | Not assessed        |

<sup>a</sup>SBP: systolic blood pressure.

<sup>b</sup>DBP: diastolic blood pressure.

<sup>c</sup>TC: total cholesterol.

<sup>d</sup>LDL-C: low-density lipoprotein cholesterol.

<sup>e</sup>HDL-C: high-density Lipoprotein cholesterol.

<sup>f</sup>SD: standard deviation.

<sup>g</sup>HbA<sub>1c</sub>: glycated haemoglobin.

<sup>h</sup>The conversion factor of LDL-C to mmol/L, multiply values by 0.02586.

<sup>i</sup>SE: standard error.

<sup>j</sup>TG: triglyceride.
