# Supplementary material for: Mobile Apps to Improve Medication Adherence in Cardiovascular Disease: Systematic Review and Meta-analysis
Source: PubMed Central journal article supplement (PMC8188316; doi:10.2196/24190), 2021-05-25

**Multimedia Appendix 4. Meta-analysis and forest plot of the effect of app-based interventions on clinical outcomes.**

**Figure 1.** Meta-analysis and forest plot of the effect of app-based interventions on systolic blood pressure (SBP), using mean values (A), using mean change values (B). REML: restricted maximum likelihood.

(A)

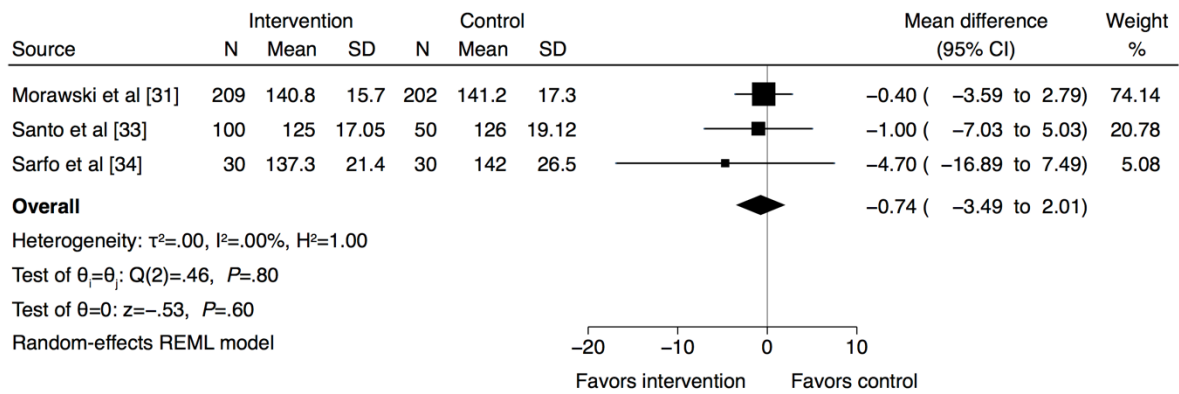

(B)

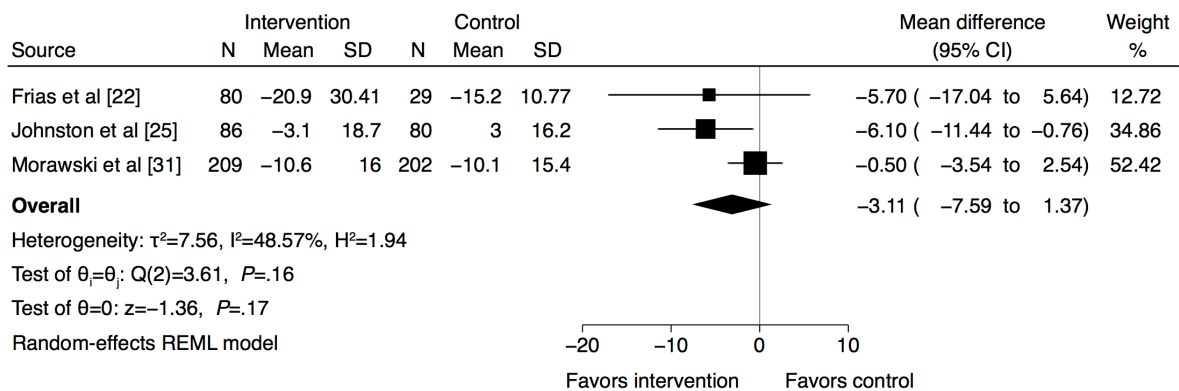

**Figure 2.** Meta-analysis and forest plot of the effect of app-based interventions on diastolic blood pressure (DBP), using mean values (A), using mean change values (B). REML: restricted maximum likelihood.

(A)

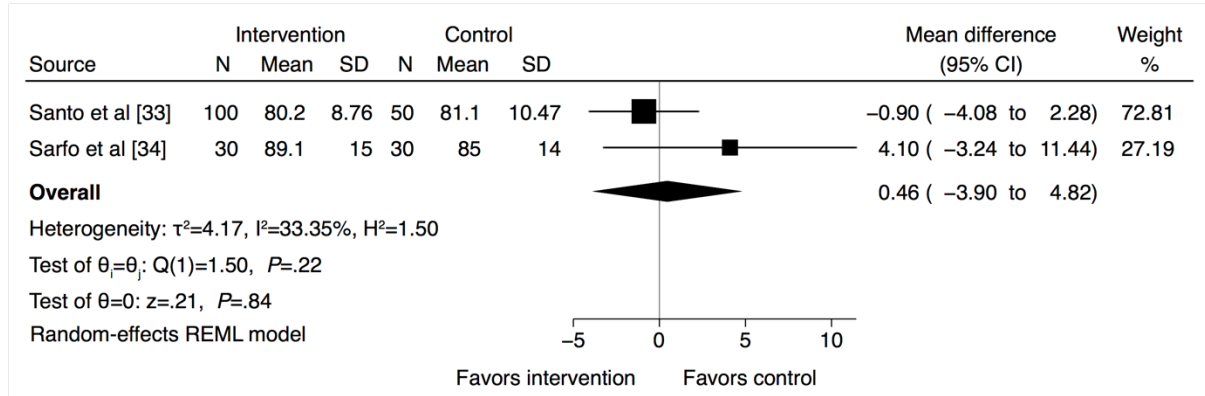

(B)

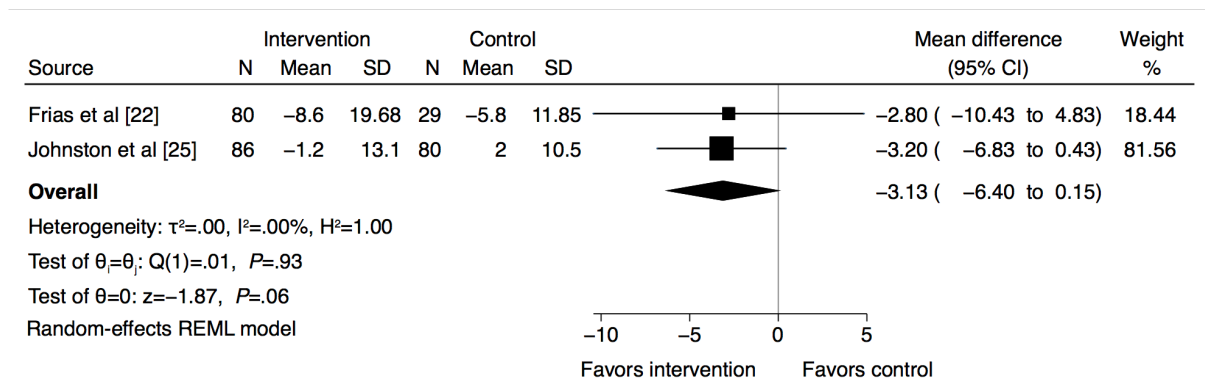

**Figure 3.** Meta-analysis and forest plot of the effect of app-based interventions on low-density lipoprotein cholesterol (LDL-C), using mean values (A), using mean change values (B). REML: restricted maximum likelihood.

(A)

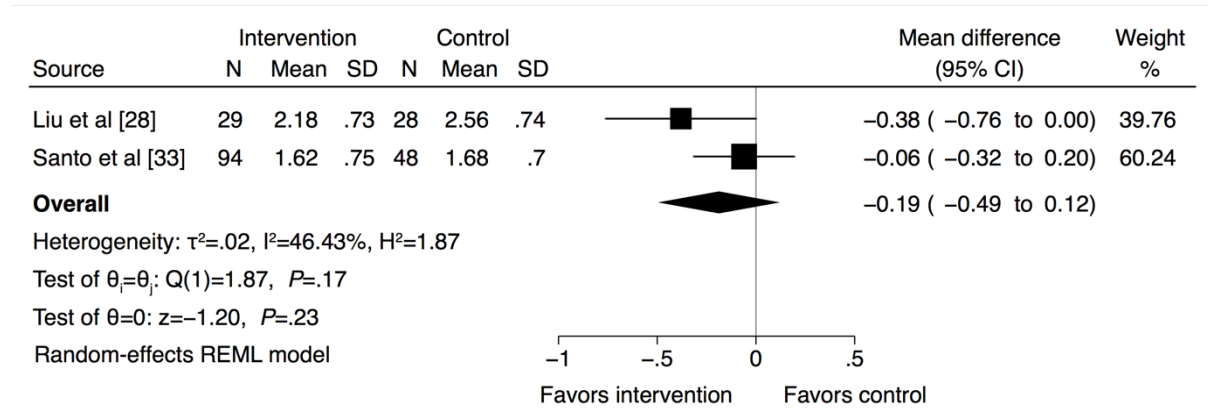

(B)

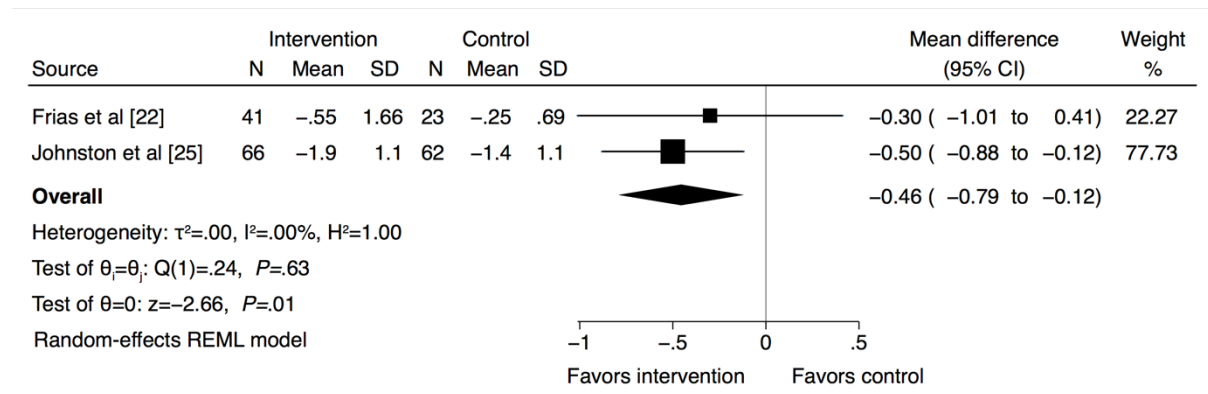

**Figure 4.** Meta-analysis and forest plot of the effect of app-based interventions on total cholesterol (TC). REML: restricted maximum likelihood.

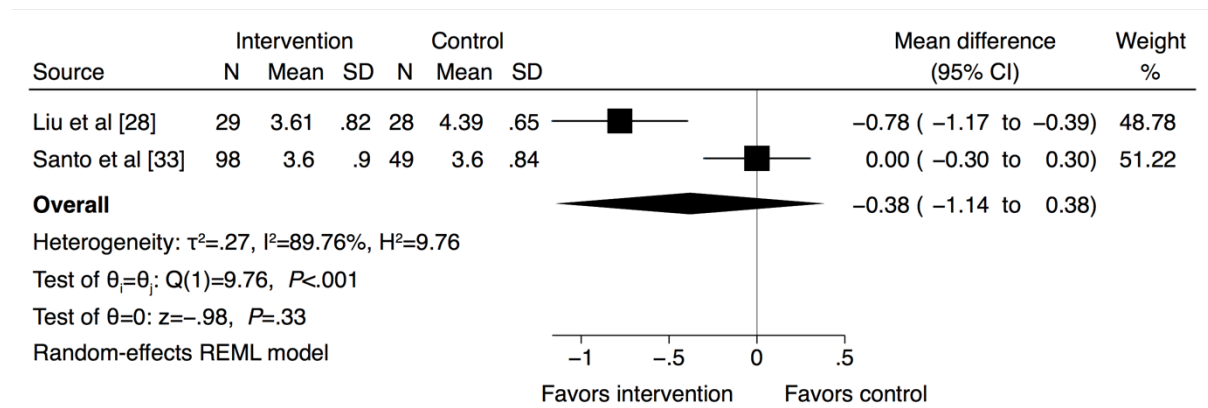

Supplement: jmir_v23i5e24190_fig.pdf [file jmir_v23i5e24190_fig.pdf]
